# Supplementary material for: The hypothiocyanite radical OSCN and its isomers
Source: Royal Society of Chemistry journal article supplement (doi:10.1039/c7cp02774e), 2017-01-01
Supplement: c7cp02774e1.pdf [file c7cp02774e1.pdf]

## Electronic Supplementary Information (ESI) for

### The hypothiocyanite radical OSCN and isomers

Zhuang Wu,<sup>a</sup> Jian Xu,<sup>a</sup> Qifan Liu,<sup>a</sup> Xuelin Dong,<sup>a</sup> Dingqing Li,<sup>a</sup> Nicole Holzmann,<sup>b</sup> Gernot Frenking,<sup>c,d\*</sup> Tarek Trabelsi,<sup>e</sup> Joseph S. Francisco<sup>f\*</sup> and Xiaoqing Zeng<sup>a\*</sup>

<sup>a</sup>College of Chemistry, Chemical Engineering and Materials Science, Soochow University, Suzhou, 215123, China. E-mail: xqzeng@suda.edu.cn

<sup>b</sup>STFC Rutherford Appleton Laboratory, Harwell Oxford, Didcot OX11 0QX, UK.

<sup>c</sup>Fachbereich Chemie, Philipps-Universität Marburg, Marburg D-35032, Germany. E-mail: frenking@chemie.uni-marburg.de

<sup>d</sup>Donostia International Physics Center (DIPC), P.K. 1072, 20080 Donostia-San Sebastian, Spain.

<sup>e</sup>Department of Chemistry, University of Nebraska – Lincoln, Lincoln, Nebraska 68526, USA.

<sup>f</sup>Department of Chemistry, Purdue University, West Lafayette, Indiana 47907, USA. E-mail: francisc@purdue.edu

**Table S1:** Calculated harmonic IR frequencies ( $\text{cm}^{-1}$ ) and intensities ( $\text{km mol}^{-1}$ , in parentheses) for various [N, C, O, S] isomers at the B3LYP/6-311+G(3df) level.

| OSCN      | OSNC       | SOCN      | ONCS       | SCON       |
|-----------|------------|-----------|------------|------------|
| 2227 (18) | 2055 (337) | 2327 (55) | 2255 (113) | 1242 (299) |
| 1074 (30) | 1145 (64)  | 1089 (72) | 1330 (124) | 1081 (206) |
| 620 (49)  | 611 (101)  | 724 (41)  | 677 (3)    | 806 (13)   |
| 474 (1)   | 424 (7)    | 546 (2)   | 454 (1)    | 408 (3)    |
| 313 (3)   | 209 (< 1)  | 481 (9)   | 282 (<1)   | 246 (2)    |
| 186 (11)  | 134 (3)    | 202 (3)   | 227 (1)    | 125 (<1)   |

**Table S2:** Calculated harmonic IR frequencies ( $\text{cm}^{-1}$ ) for SNCO and SONC at various levels.

| SNCO               |                      |                          | SONC               |                      |                          |
|--------------------|----------------------|--------------------------|--------------------|----------------------|--------------------------|
| B3LYP <sup>a</sup> | CCSD(T) <sup>b</sup> | CCSD(T)-F12 <sup>c</sup> | B3LYP <sup>a</sup> | CCSD(T) <sup>b</sup> | CCSD(T)-F12 <sup>c</sup> |
| 2333 (1201)        | 2254                 | 2276                     | 2152 (147)         | 2098                 | 2119                     |
| 1447 (1)           | 1385                 | 1402                     | 886 (19)           | 880                  | 899                      |
| 670 (15)           | 699                  | 706                      | 735 (18)           | 749                  | 761                      |
| 547 (28)           | 590                  | 591                      | 451 (5)            | 441                  | 449                      |
| 492 (27)           | 508                  | 510                      | 256 (<1)           | 237                  | 233                      |
| 115 (11)           | 119                  | 125                      | 160 (<1)           | 148                  | 151                      |

<sup>a</sup> At the 6-311+G(3df) basis set. The calculated IR intensities ( $\text{km mol}^{-1}$ ) are given in parentheses. <sup>b</sup> At the aug-cc-pV(T+d)Z basis set. <sup>c</sup> At the VTZ-F12 basis set.

**Table S3:** Calculated IR frequencies ( $\text{cm}^{-1}$ ) of  $\text{CF}_3\text{S}(\text{O})\text{CN}$  isomers.

| $\text{CF}_3\text{S}(\text{O})\text{CN}$ |                       | $\text{CF}_3\text{OSCN}$ | $\text{CF}_3\text{S}(\text{O})\text{NC}$ | $\text{CF}_3\text{SOCN}$ |
|------------------------------------------|-----------------------|--------------------------|------------------------------------------|--------------------------|
| calculated <sup>a</sup>                  | observed <sup>b</sup> | calculated <sup>a</sup>  | calculated <sup>a</sup>                  | calculated <sup>a</sup>  |
| 2283 (24)                                | 2175.3                | 2245 (0.4)               | 2091 (424)                               | 2344 (132)               |
| 1224 (263)                               | 1236.9                | 1251 (344)               | 1238 (278)                               | 1178 (250)               |
| 1206 (284)                               | 1217.7                | 1193 (300)               | 1219 (186)                               | 1172 (251)               |
| 1179 (<1)                                |                       | 1151 (604)               | 1191 (109)                               | 1108 (249)               |
| 1094 (344)                               | 1107.8                | 923 (43)                 | 1106 (323)                               | 1083 (203)               |
| 748 (11)                                 | 751.3                 | 766 (24)                 | 749 (6)                                  | 761 (14)                 |
| 607 (51)                                 | 607.1                 | 691 (14)                 | 608 (100)                                | 690 (30)                 |
| 564 (12)                                 |                       | 658 (1)                  | 568 (31)                                 | 565 (2)                  |
| 535 (10)                                 |                       | 617 (4)                  | 538 (13)                                 | 537 (3)                  |
| 475 (13)                                 |                       | 544 (14)                 | 470 (27)                                 | 532 (5)                  |
| 460 (12)                                 |                       | 490 (3)                  | 417 (15)                                 | 512 (8)                  |
| 361 (4)                                  |                       | 421 (1)                  | 334 (<1)                                 | 458 (7)                  |
| 296 (3)                                  |                       | 399 (3)                  | 286 (1)                                  | 325 (1)                  |
| 272 (2)                                  |                       | 371 (8)                  | 235 (<1)                                 | 316 (1)                  |
| 184 (8)                                  |                       | 206 (3)                  | 185 (4)                                  | 194 (4)                  |
| 178 (8)                                  |                       | 176 (5)                  | 142 (4)                                  | 168 (1)                  |
| 111 (3)                                  |                       | 72 (2)                   | 98 (1)                                   | 55 (2)                   |
| 52 (4)                                   |                       | 44 (2)                   | 52 (<1)                                  | 47 (1)                   |

<sup>a</sup>Calculated frequencies (unscaled) at the B3LYP/6-311++G(3df,3pd) level. <sup>b</sup>Observed band positions of the most intense site in solid Ar matrix.

**Table S4:** Results of the EDA-NOCV calculations of [O, S, C, N] isomers at BP86/TZ2P+ using the UCCSD(T)-F12/VTZ-F12 optimized geometries. Energy values in kcal/mol.

|                            | OS-CN   | OS-NC   | SN-CO   | SO-CN   | SO-NC   |
|----------------------------|---------|---------|---------|---------|---------|
|                            | D/T     | D/T     | D/S     | D/T     | D/T     |
| $\Delta E_{\text{int}}$    | -75.55  | -61.26  | -40.82  | -62.76  | -8.81   |
| $\Delta E_{\text{Pauli}}$  | 266.45  | 347.14  | 913.79  | 505.72  | 505.93  |
| $\Delta E_{\text{elstat}}$ | -127.85 | -151.72 | -328.36 | -208.46 | -191.32 |
|                            | 37.4%   | 37.2%   | 34.4%   | 36.7%   | 37.2%   |
| $\Delta E_{\text{orb}}$    | -214.15 | -256.67 | -626.25 | -360.01 | -323.41 |
|                            | 62.6%   | 62.8%   | 65.6%   | 63.3%   | 62.8%   |

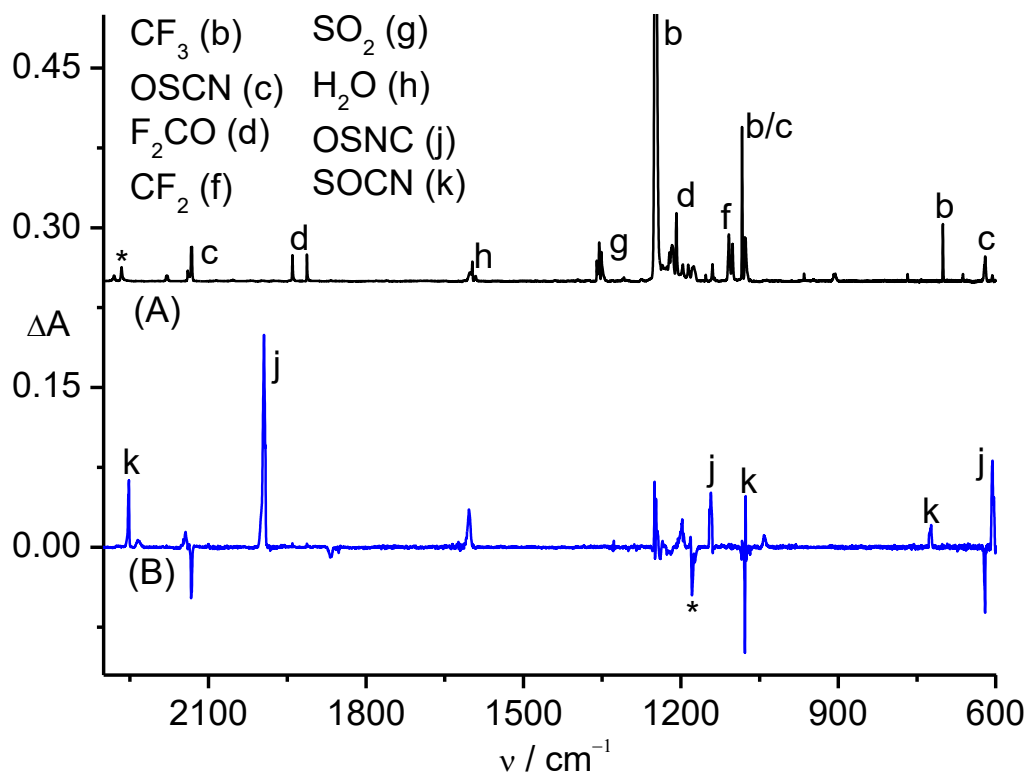

**Figure S1:** (A) IR spectrum of the flash vacuum pyrolysis (1000 K) products of  $\text{CF}_3\text{S}(\text{O})\text{CN}$  in solid  $\text{N}_2$  matrix at 2.8 K. (B) IR difference spectrum showing the conversion from OSCN (c) to OSNC (j) and SOCN (k) upon UV light (365 nm) irradiation in solid  $\text{N}_2$  matrix at 2.8 K. The IR bands for unknown species are marked with asterisks.

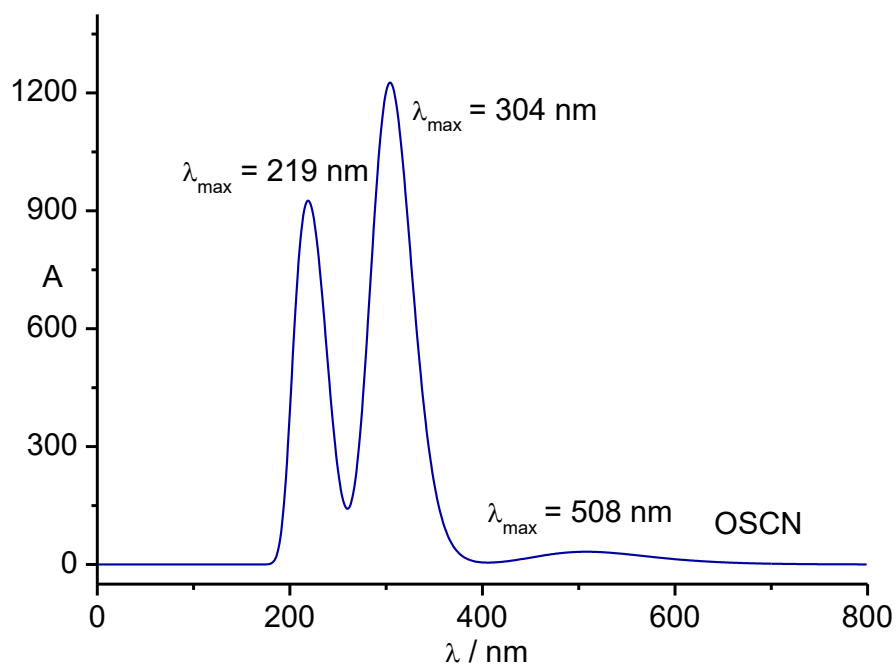

**Figure S2:** Calculated UV/Vis spectra of OSCN at the TD-B3LYP/6-311+G(3df) level.

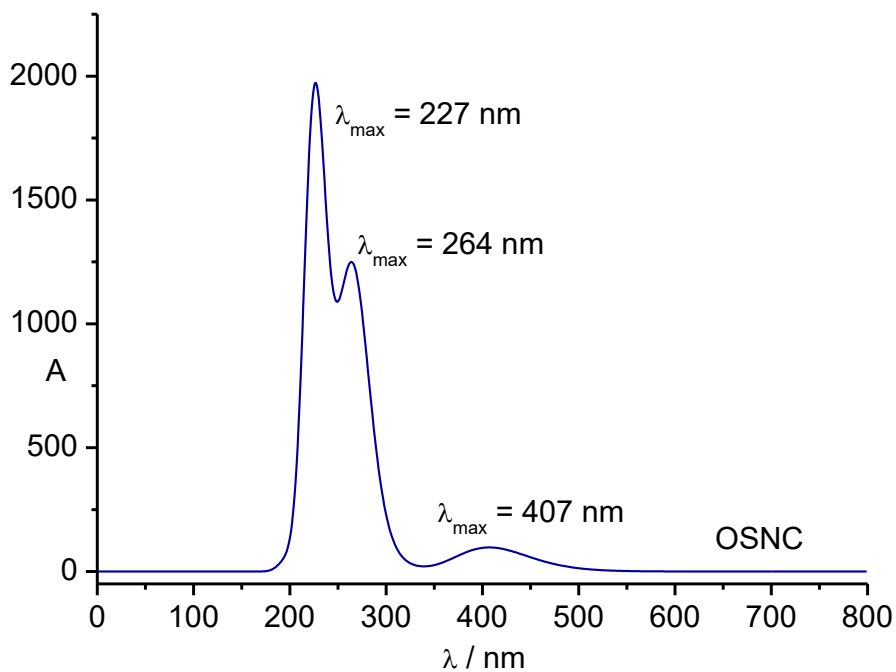

**Figure S3:** Calculated UV/Vis spectra of OSNC at the TD-B3LYP/6-311+G(3df) level.

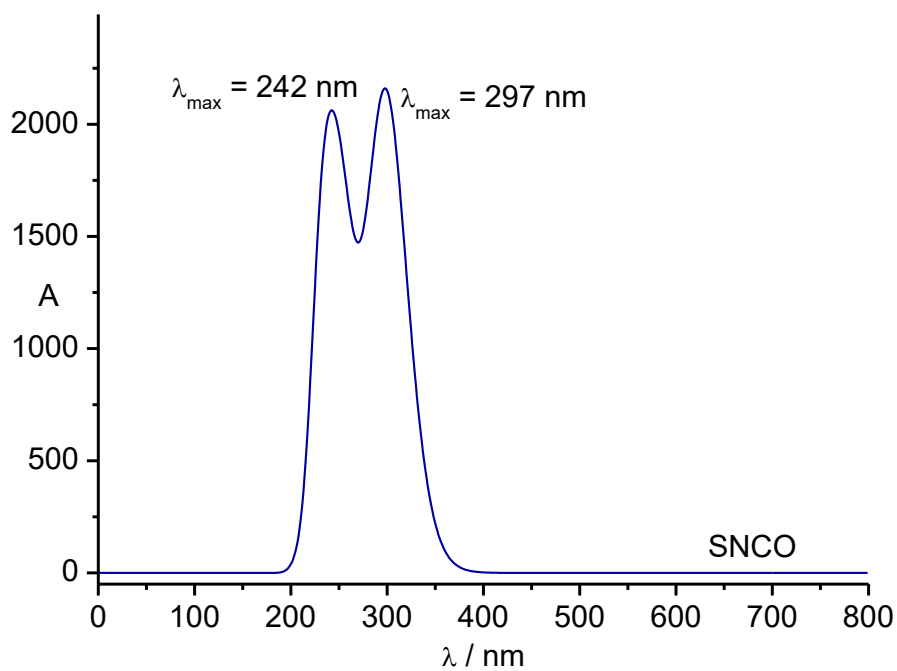

**Figure S4:** Calculated UV/Vis spectra of SNCO at the TD-B3LYP/6-311+G(3df) level.

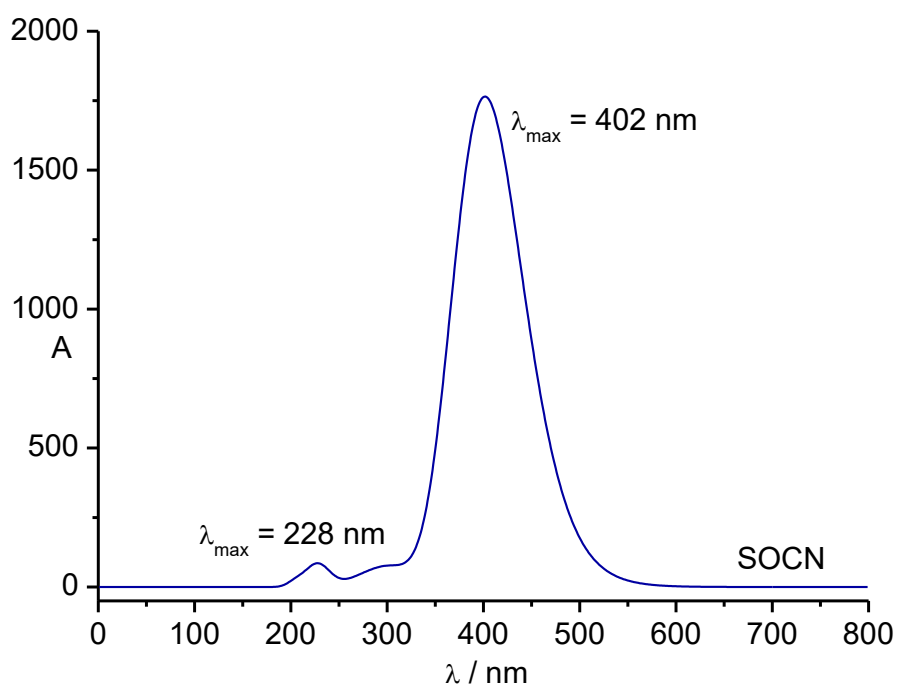

**Figure S5:** Calculated UV/Vis spectra of SOCN at the TD-B3LYP/6-311+G(3df) level.

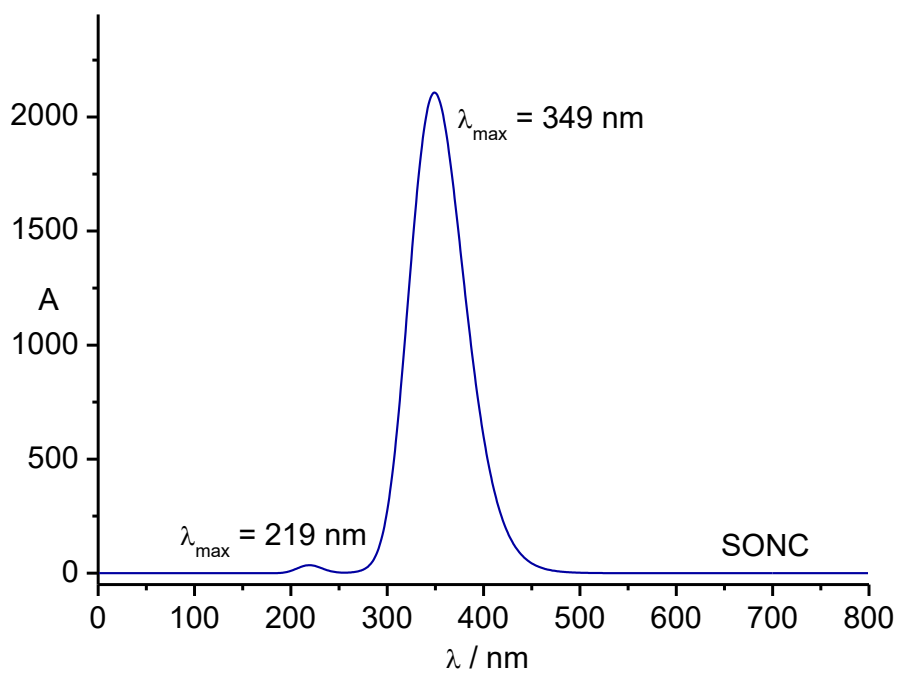

**Figure S6:** Calculated UV/Vis spectra of SONC at the TD-B3LYP/6-311+G(3df) level.

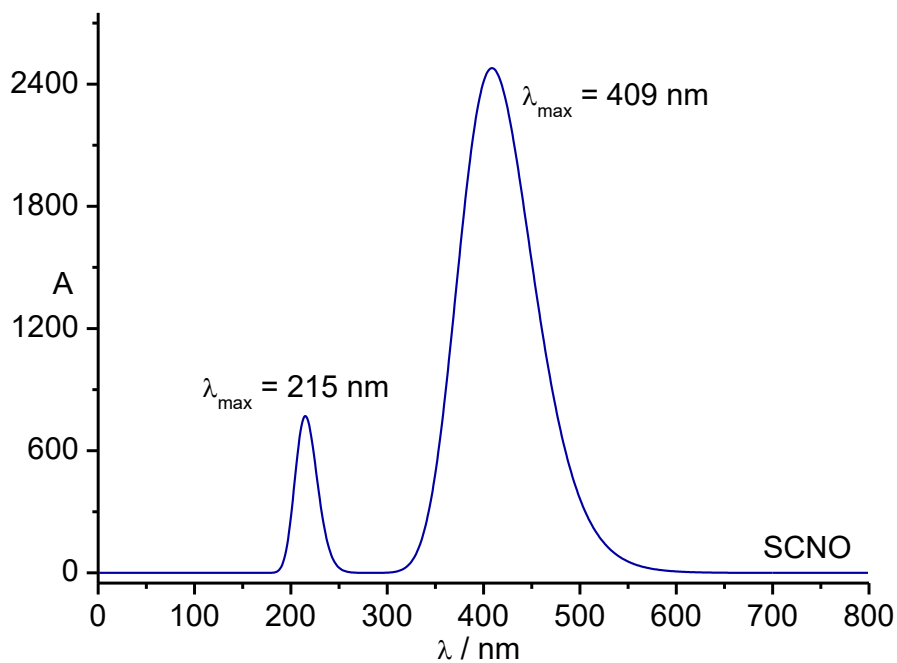

**Figure S7:** Calculated UV/Vis spectra of SCNO at the TD-B3LYP/6-311+G(3df) level

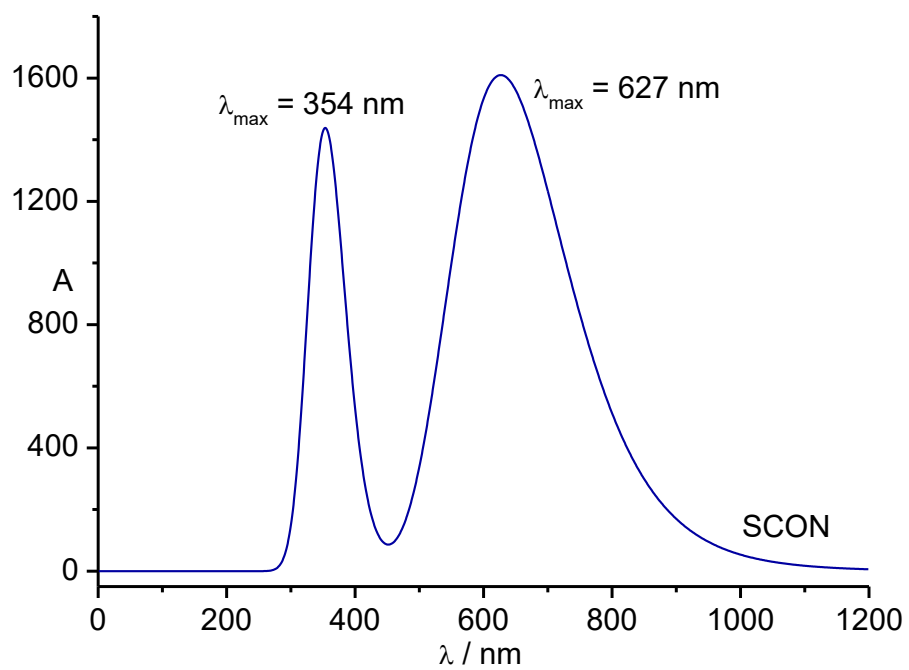

**Figure S8:** Calculated UV/Vis spectra of SCON at the TD-B3LYP/6-311+G(3df) level.



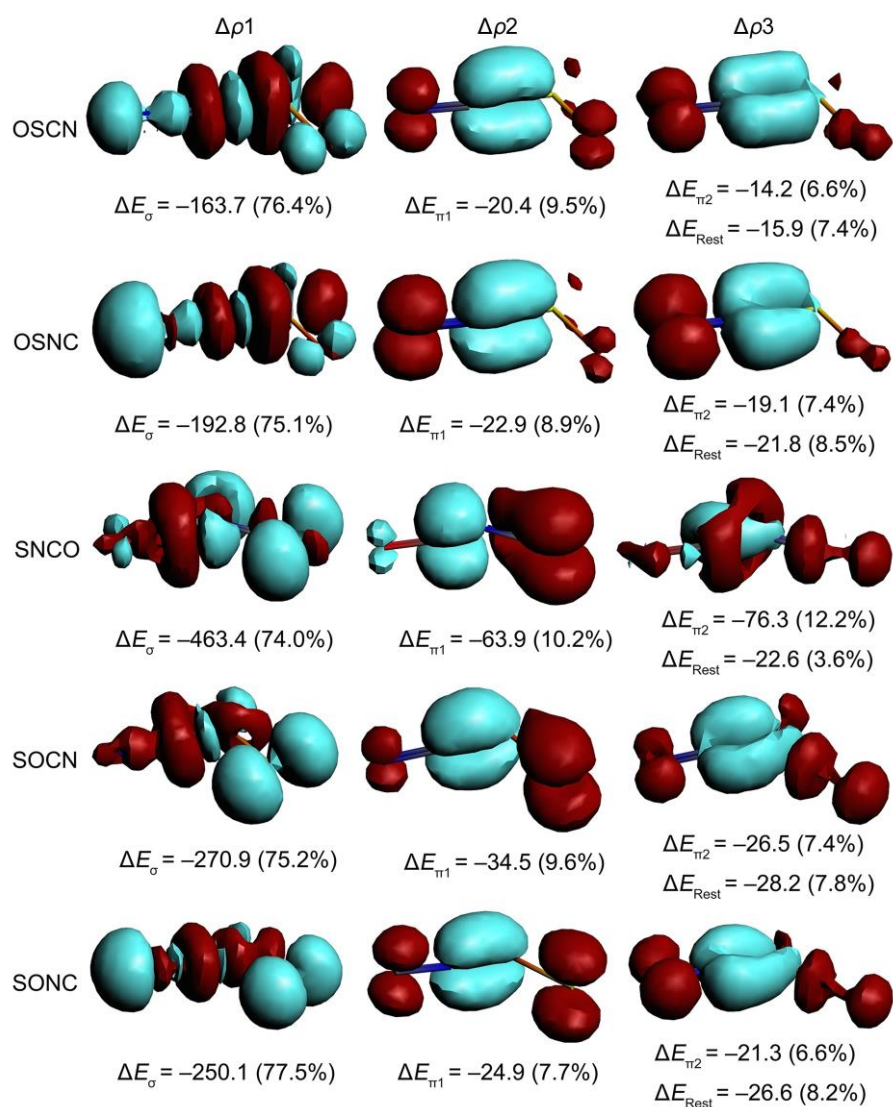

**Figure S9:** Plot of deformation densities  $\Delta\rho$  of the pairwise orbital interactions between diatomic fragments in [S, O, C, N] isomers (see Table S3). The direction of the charge flow is red→blue

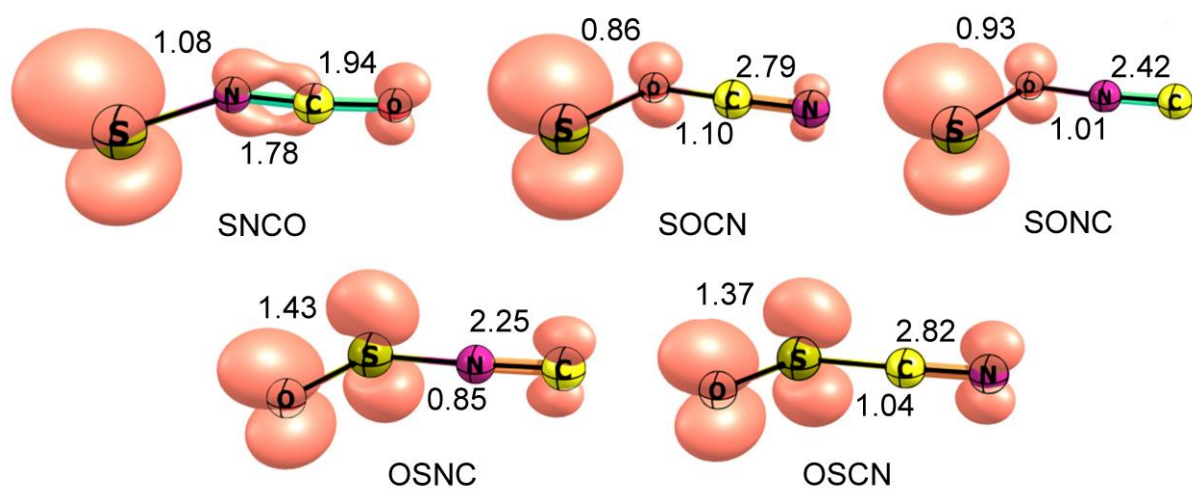

**Figure S10:** Calculated Wiberg bond indices of the [C, N, O, S] isomers at the UBP86/TZ2P+ level.

**Calculated Atomic Coordinates (in Angstroms) and Energies (in Hartrees) for All Optimized Structures at the B3LYP/6-311+G(3df) Level of Theory.**

**OSCN**

|   |             |             |             |
|---|-------------|-------------|-------------|
| S | -0.61765400 | -0.48556700 | -0.00000700 |
| O | -1.45013300 | 0.74777700  | -0.00001300 |
| C | 1.04512400  | 0.00101800  | 0.00014800  |
| N | 2.17325500  | 0.25439300  | -0.00009600 |

|                                              |  |           |             |
|----------------------------------------------|--|-----------|-------------|
| Zero-point correction=                       |  |           | 0.011153    |
| Thermal correction to Energy=                |  |           | 0.015392    |
| Thermal correction to Enthalpy=              |  |           | 0.016336    |
| Thermal correction to Gibbs Free Energy=     |  | -0.016529 |             |
| Sum of electronic and zero-point Energies=   |  |           | -566.276588 |
| Sum of electronic and thermal Energies=      |  |           | -566.272350 |
| Sum of electronic and thermal Enthalpies=    |  |           | -566.271406 |
| Sum of electronic and thermal Free Energies= |  |           | -566.304271 |

**OSNC**

|   |             |             |             |
|---|-------------|-------------|-------------|
| S | 0.56034700  | -0.47385800 | -0.00003700 |
| O | 1.43280600  | 0.70914600  | 0.00004000  |
| N | -1.03769400 | 0.03796300  | 0.00000600  |
| C | -2.19402300 | 0.27380400  | 0.00004000  |

|                                              |  |           |             |
|----------------------------------------------|--|-----------|-------------|
| Zero-point correction=                       |  |           | 0.010436    |
| Thermal correction to Energy=                |  |           | 0.014946    |
| Thermal correction to Enthalpy=              |  |           | 0.015890    |
| Thermal correction to Gibbs Free Energy=     |  | -0.017568 |             |
| Sum of electronic and zero-point Energies=   |  |           | -566.253840 |
| Sum of electronic and thermal Energies=      |  |           | -566.249330 |
| Sum of electronic and thermal Enthalpies=    |  |           | -566.248385 |
| Sum of electronic and thermal Free Energies= |  |           | -566.281844 |

**SONC**

|   |             |             |            |
|---|-------------|-------------|------------|
| S | -1.36281600 | -0.25658400 | 0.00000000 |
| O | 0.00000000  | 0.70523600  | 0.00000000 |
| C | 2.26749200  | -0.34277500 | 0.00000000 |
| N | 1.17144400  | 0.07430100  | 0.00000000 |

|                                              |  |           |             |
|----------------------------------------------|--|-----------|-------------|
| Zero-point correction=                       |  |           | 0.010573    |
| Thermal correction to Energy=                |  |           | 0.014930    |
| Thermal correction to Enthalpy=              |  |           | 0.015874    |
| Thermal correction to Gibbs Free Energy=     |  | -0.017183 |             |
| Sum of electronic and zero-point Energies=   |  |           | -566.156944 |
| Sum of electronic and thermal Energies=      |  |           | -566.152587 |
| Sum of electronic and thermal Enthalpies=    |  |           | -566.151643 |
| Sum of electronic and thermal Free Energies= |  |           | -566.184699 |

**SNCO**

|   |             |             |            |
|---|-------------|-------------|------------|
| N | 0.00000000  | 0.32442700  | 0.00000000 |
| O | 2.30713600  | -0.20509700 | 0.00000000 |
| S | -1.58700600 | -0.03287500 | 0.00000000 |
| C | 1.15583500  | -0.01736700 | 0.00000000 |

|                        |  |  |          |
|------------------------|--|--|----------|
| Zero-point correction= |  |  | 0.012770 |
|------------------------|--|--|----------|

|                                              |  |  |             |
|----------------------------------------------|--|--|-------------|
| Thermal correction to Energy=                |  |  | 0.016862    |
| Thermal correction to Enthalpy=              |  |  | 0.017806    |
| Thermal correction to Gibbs Free Energy=     |  |  | -0.014310   |
| Sum of electronic and zero-point Energies=   |  |  | -566.303728 |
| Sum of electronic and thermal Energies=      |  |  | -566.299636 |
| Sum of electronic and thermal Enthalpies=    |  |  | -566.298691 |
| Sum of electronic and thermal Free Energies= |  |  | -566.330808 |

#### SOCN

|   |             |             |            |
|---|-------------|-------------|------------|
| S | -1.39815500 | -0.23822500 | 0.00000000 |
| O | 0.00000000  | 0.70115000  | 0.00000000 |
| C | 1.14998500  | 0.10710400  | 0.00000000 |
| N | 2.21008100  | -0.34860300 | 0.00000000 |

|                                              |  |  |             |
|----------------------------------------------|--|--|-------------|
| Zero-point correction=                       |  |  | 0.012239    |
| Thermal correction to Energy=                |  |  | 0.016188    |
| Thermal correction to Enthalpy=              |  |  | 0.017132    |
| Thermal correction to Gibbs Free Energy=     |  |  | -0.015141   |
| Sum of electronic and zero-point Energies=   |  |  | -566.242815 |
| Sum of electronic and thermal Energies=      |  |  | -566.238866 |
| Sum of electronic and thermal Enthalpies=    |  |  | -566.237922 |
| Sum of electronic and thermal Free Energies= |  |  | -566.270195 |

#### SCNO

|   |            |            |             |
|---|------------|------------|-------------|
| O | 0.00000000 | 0.00000000 | -2.34260100 |
| N | 0.00000000 | 0.00000000 | -1.13221500 |
| S | 0.00000000 | 0.00000000 | 1.64846100  |
| C | 0.00000000 | 0.00000000 | 0.04848900  |

|                                              |  |  |             |
|----------------------------------------------|--|--|-------------|
| Zero-point correction=                       |  |  | 0.012425    |
| Thermal correction to Energy=                |  |  | 0.016660    |
| Thermal correction to Enthalpy=              |  |  | 0.017604    |
| Thermal correction to Gibbs Free Energy=     |  |  | -0.012847   |
| Sum of electronic and zero-point Energies=   |  |  | -566.238998 |
| Sum of electronic and thermal Energies=      |  |  | -566.234764 |
| Sum of electronic and thermal Enthalpies=    |  |  | -566.233819 |
| Sum of electronic and thermal Free Energies= |  |  | -566.264271 |

#### SCON

|   |             |             |            |
|---|-------------|-------------|------------|
| S | -1.54301200 | 0.10413000  | 0.00000000 |
| C | 0.00000000  | 0.41911300  | 0.00000000 |
| O | 1.05324200  | -0.42035500 | 0.00000000 |
| N | 2.32317900  | -0.11684600 | 0.00000000 |

|                                              |  |  |             |
|----------------------------------------------|--|--|-------------|
| Zero-point correction=                       |  |  | 0.008903    |
| Thermal correction to Energy=                |  |  | 0.013334    |
| Thermal correction to Enthalpy=              |  |  | 0.014279    |
| Thermal correction to Gibbs Free Energy=     |  |  | -0.018699   |
| Sum of electronic and zero-point Energies=   |  |  | -566.134415 |
| Sum of electronic and thermal Energies=      |  |  | -566.129983 |
| Sum of electronic and thermal Enthalpies=    |  |  | -566.129039 |
| Sum of electronic and thermal Free Energies= |  |  | -566.162017 |

#### TS1

|   |             |             |            |
|---|-------------|-------------|------------|
| S | -0.97687900 | -0.22754800 | 0.00000100 |
|---|-------------|-------------|------------|

|   |            |             |             |
|---|------------|-------------|-------------|
| O | 0.19225800 | 1.12479200  | -0.00000200 |
| C | 1.15557400 | 0.24113800  | 0.00000400  |
| N | 1.02265000 | -0.97205700 | -0.00000200 |

|                                              |  |  |             |
|----------------------------------------------|--|--|-------------|
| Zero-point correction=                       |  |  | 0.010558    |
| Thermal correction to Energy=                |  |  | 0.013943    |
| Thermal correction to Enthalpy=              |  |  | 0.014888    |
| Thermal correction to Gibbs Free Energy=     |  |  | -0.016274   |
| Sum of electronic and zero-point Energies=   |  |  | -566.172205 |
| Sum of electronic and thermal Energies=      |  |  | -566.168820 |
| Sum of electronic and thermal Enthalpies=    |  |  | -566.167876 |
| Sum of electronic and thermal Free Energies= |  |  | -566.199037 |

## TS2

|   |             |             |             |
|---|-------------|-------------|-------------|
| S | -0.93017000 | -0.43561300 | -0.00001200 |
| O | -0.35824700 | 1.16664000  | -0.00000400 |
| C | 0.72637000  | -0.19402000 | 0.00008400  |
| N | 1.91292400  | -0.17131300 | -0.00004100 |

|                                              |  |  |             |
|----------------------------------------------|--|--|-------------|
| Zero-point correction=                       |  |  | 0.009294    |
| Thermal correction to Energy=                |  |  | 0.013044    |
| Thermal correction to Enthalpy=              |  |  | 0.013988    |
| Thermal correction to Gibbs Free Energy=     |  |  | -0.017916   |
| Sum of electronic and zero-point Energies=   |  |  | -566.187514 |
| Sum of electronic and thermal Energies=      |  |  | -566.183763 |
| Sum of electronic and thermal Enthalpies=    |  |  | -566.182819 |
| Sum of electronic and thermal Free Energies= |  |  | -566.214723 |

## TS3

|   |             |             |             |
|---|-------------|-------------|-------------|
| S | 0.44023400  | -0.47665900 | -0.03471700 |
| O | 1.38886900  | 0.63127700  | 0.01912600  |
| C | -1.31225500 | 0.13561300  | 0.66369100  |
| N | -1.46873800 | 0.25180700  | -0.51138400 |

|                                              |  |  |             |
|----------------------------------------------|--|--|-------------|
| Zero-point correction=                       |  |  | 0.009374    |
| Thermal correction to Energy=                |  |  | 0.013439    |
| Thermal correction to Enthalpy=              |  |  | 0.014383    |
| Thermal correction to Gibbs Free Energy=     |  |  | -0.018060   |
| Sum of electronic and zero-point Energies=   |  |  | -566.223585 |
| Sum of electronic and thermal Energies=      |  |  | -566.219519 |
| Sum of electronic and thermal Enthalpies=    |  |  | -566.218575 |
| Sum of electronic and thermal Free Energies= |  |  | -566.251018 |

## TS4

|   |             |             |             |
|---|-------------|-------------|-------------|
| S | -0.99357000 | -0.37904300 | -0.00037800 |
| O | -0.11844700 | 1.12971200  | -0.00052700 |
| N | 0.74897700  | -0.09569300 | 0.00317700  |
| C | 1.93364300  | -0.38386100 | -0.00199700 |

|                                            |  |  |             |
|--------------------------------------------|--|--|-------------|
| Zero-point correction=                     |  |  | 0.008260    |
| Thermal correction to Energy=              |  |  | 0.012174    |
| Thermal correction to Enthalpy=            |  |  | 0.013118    |
| Thermal correction to Gibbs Free Energy=   |  |  | -0.019017   |
| Sum of electronic and zero-point Energies= |  |  | -566.094316 |
| Sum of electronic and thermal Energies=    |  |  | -566.090402 |

Sum of electronic and thermal Enthalpies= -566.089458  
 Sum of electronic and thermal Free Energies= -566.121593

**SN**

N 0.00000000 0.00000000 -1.03673800  
 S 0.00000000 0.00000000 0.45357300

Zero-point correction= 0.002872  
 Thermal correction to Energy= 0.005245  
 Thermal correction to Enthalpy= 0.006189  
 Thermal correction to Gibbs Free Energy= -0.018467  
 Sum of electronic and zero-point Energies= -452.915919  
 Sum of electronic and thermal Energies= -452.913546  
 Sum of electronic and thermal Enthalpies= -452.912602  
 Sum of electronic and thermal Free Energies= -452.937258

**singlet SO**

S 0.00000000 0.00000000 0.49625300  
 O 0.00000000 0.00000000 -0.99250600

Zero-point correction= 0.002635  
 Thermal correction to Energy= 0.005016  
 Thermal correction to Enthalpy= 0.005960  
 Thermal correction to Gibbs Free Energy= -0.018194  
 Sum of electronic and zero-point Energies= -473.378933  
 Sum of electronic and thermal Energies= -473.376552  
 Sum of electronic and thermal Enthalpies= -473.375608  
 Sum of electronic and thermal Free Energies= -473.399761

**triplet SO**

S 0.00000000 0.00000000 0.49611100  
 O 0.00000000 0.00000000 -0.99222100

Zero-point correction= 0.002636  
 Thermal correction to Energy= 0.005017  
 Thermal correction to Enthalpy= 0.005961  
 Thermal correction to Gibbs Free Energy= -0.019229  
 Sum of electronic and zero-point Energies= -473.424353  
 Sum of electronic and thermal Energies= -473.421973  
 Sum of electronic and thermal Enthalpies= -473.421029  
 Sum of electronic and thermal Free Energies= -473.446219

**CN**

C 0.00000000 0.00000000 -0.62576400  
 N 0.00000000 0.00000000 0.53636900

Zero-point correction= 0.004901 (Hartree/Particle)  
 Thermal correction to Energy= 0.007262  
 Thermal correction to Enthalpy= 0.008206  
 Thermal correction to Gibbs Free Energy= -0.014771  
 Sum of electronic and zero-point Energies= -92.739756  
 Sum of electronic and thermal Energies= -92.737396  
 Sum of electronic and thermal Enthalpies= -92.736451  
 Sum of electronic and thermal Free Energies= -92.759429

**CO**

|   |            |            |             |
|---|------------|------------|-------------|
| O | 0.00000000 | 0.00000000 | 0.48191000  |
| C | 0.00000000 | 0.00000000 | -0.64254600 |

|                                              |             |
|----------------------------------------------|-------------|
| Zero-point correction=                       | 0.005050    |
| Thermal correction to Energy=                | 0.007411    |
| Thermal correction to Enthalpy=              | 0.008355    |
| Thermal correction to Gibbs Free Energy=     | -0.014066   |
| Sum of electronic and zero-point Energies=   | -113.351743 |
| Sum of electronic and thermal Energies=      | -113.349382 |
| Sum of electronic and thermal Enthalpies=    | -113.348438 |
| Sum of electronic and thermal Free Energies= | -113.370858 |

**CF<sub>3</sub>S(O)NC**

|   |             |             |             |
|---|-------------|-------------|-------------|
| C | 0.96949800  | -0.24427100 | 0.02588800  |
| F | 1.98788700  | 0.56234600  | -0.26336800 |
| F | 0.97479400  | -0.51701500 | 1.31724500  |
| F | 1.08008300  | -1.36453000 | -0.68024700 |
| S | -0.61368100 | 0.69458600  | -0.50172600 |
| O | -0.75290000 | 1.79951800  | 0.42840100  |
| N | -1.61002900 | -0.59839800 | -0.00101800 |
| C | -2.51492700 | -1.33038500 | 0.18158700  |

|                                              |             |
|----------------------------------------------|-------------|
| Zero-point correction=                       | 0.026264    |
| Thermal correction to Energy=                | 0.034471    |
| Thermal correction to Enthalpy=              | 0.035415    |
| Thermal correction to Gibbs Free Energy=     | -0.007700   |
| Sum of electronic and zero-point Energies=   | -903.991308 |
| Sum of electronic and thermal Energies=      | -903.983101 |
| Sum of electronic and thermal Enthalpies=    | -903.982157 |
| Sum of electronic and thermal Free Energies= | -904.025272 |

**CF<sub>3</sub>OSCN**

|   |             |             |             |
|---|-------------|-------------|-------------|
| C | -1.22088200 | 0.15958800  | 0.01069500  |
| F | -1.73715000 | -0.72364900 | -0.84688100 |
| F | -2.16642400 | 0.55801700  | 0.84506000  |
| F | -0.78017600 | 1.20324400  | -0.68889700 |
| S | 1.10531600  | -1.03895400 | -0.01234900 |
| O | -0.22728400 | -0.40188800 | 0.78626300  |
| C | 2.16026700  | 0.27928100  | 0.01069800  |
| N | 2.95009500  | 1.12380500  | -0.00063100 |

|                                              |             |
|----------------------------------------------|-------------|
| Zero-point correction=                       | 0.027835    |
| Thermal correction to Energy=                | 0.035408    |
| Thermal correction to Enthalpy=              | 0.036352    |
| Thermal correction to Gibbs Free Energy=     | -0.005896   |
| Sum of electronic and zero-point Energies=   | -904.049559 |
| Sum of electronic and thermal Energies=      | -904.041987 |
| Sum of electronic and thermal Enthalpies=    | -904.041043 |
| Sum of electronic and thermal Free Energies= | -904.083291 |

**Calculated Atomic Coordinates (in Angstroms) and Energies (in Hartrees) for All Optimized Structures at the CCSD(T)/aug-cc-PV(T+D)Z and CCSD(T)-F12/VTZ-F12 Level of Theory.**

**OSCN**

UCCSD(T)/AUG-CC-PV(T+D)Z ENERGY=-565.51030924

|   |               |               |               |
|---|---------------|---------------|---------------|
| S | 0.0803608034  | -0.3640140924 | -0.0339056301 |
| C | -0.2393613493 | 0.4591940665  | 1.4706226965  |
| O | 1.4067287167  | 0.1024690373  | -0.5189150705 |
| N | -0.5123351708 | 0.9781049886  | 2.4822020040  |

UCCSD(T)-F12/VTZ-F12 ENERGY=-565.58571616

|   |               |               |               |
|---|---------------|---------------|---------------|
| S | 0.0825416712  | -0.3600143146 | -0.0299701518 |
| C | -0.2363954861 | 0.4592262158  | 1.4682038010  |
| O | 1.4003070932  | 0.1018312015  | -0.5141681229 |
| N | -0.5110602783 | 0.9747108973  | 2.4759384737  |

**OSNC**

UCCSD(T)/AUG-CC-PV(T+D)Z ENERGY=-565.48591456

|   |              |               |               |
|---|--------------|---------------|---------------|
| C | 1.6082377006 | 1.2467571408  | 1.9699790098  |
| N | 1.0615422971 | 0.4054092893  | 1.3292174049  |
| S | 0.2020743224 | -0.7998589714 | 0.5210400927  |
| O | 0.8457996799 | -1.0235494587 | -0.7841565074 |

UCCSD(T)-F12/VTZ-F12 ENERGY=-565.56146293

|   |              |               |               |
|---|--------------|---------------|---------------|
| C | 1.6035151509 | 1.2406465851  | 1.9664052331  |
| N | 1.0623025294 | 0.4029683389  | 1.3239866164  |
| S | 0.2075839322 | -0.7948558275 | 0.5216011099  |
| O | 0.8442523876 | -1.0200010965 | -0.7759129593 |

**SNCO**

UCCSD(T)/AUG-CC-PV(T+D)Z ENERGY=-565.52908563

|   |              |               |               |
|---|--------------|---------------|---------------|
| C | 0.6807537658 | -0.5029105953 | 0.3372813835  |
| N | 0.7639011959 | 0.1668429383  | 1.3608854913  |
| S | 1.7609049230 | 1.3597757796  | 1.9367688321  |
| O | 0.4572651154 | -1.2181401227 | -0.5595637070 |

UCCSD(T)-F12/VTZ-F12 ENERGY=-565.60279507

|   |              |               |               |
|---|--------------|---------------|---------------|
| C | 0.6818361946 | -0.5026039961 | 0.3364334953  |
| N | 0.7749770762 | 0.1706009454  | 1.3508273536  |
| S | 1.7530879828 | 1.3556072702  | 1.9411808564  |
| O | 0.4529237464 | -1.2180362195 | -0.5530697053 |

**SOCN**

UCCSD(T)/AUG-CC-PV(T+D)Z ENERGY=-565.47773970

|   |               |               |               |
|---|---------------|---------------|---------------|
| C | 0.5047841807  | -0.0004490710 | 0.3605474304  |
| O | -0.1038023773 | -0.1427781176 | 1.5143463168  |
| N | 1.0578505189  | 0.0545695436  | -0.6641262066 |
| S | -0.7234403223 | 1.2644116450  | 2.1892364595  |

UCCSD(T)-F12/VTZ-F12 ENERGY=-565.54989735

|   |               |               |               |
|---|---------------|---------------|---------------|
| C | 0.5038326287  | 0.0000051118  | 0.3621302860  |
| O | -0.1033796630 | -0.1383886921 | 1.5121641609  |
| N | 1.0546207827  | 0.0552339965  | -0.6584588359 |
| S | -0.7196817485 | 1.2589035839  | 2.1841683890  |



**SONC**

UCCSD(T)/AUG-CC-PV(T+D)Z ENERGY=-565.38964742

|   |              |               |               |
|---|--------------|---------------|---------------|
| N | 0.0000000000 | 0.0520092322  | 1.1739533353  |
| C | 0.0000000000 | -0.4091781105 | 2.2650866045  |
| O | 0.0000000000 | 0.7308159925  | 0.0102666862  |
| S | 0.0000000000 | -0.2346597149 | -1.3451596759 |

UCCSD(T)-F12/VTZ-F12 ENERGY=-565.46092431

|   |              |               |               |
|---|--------------|---------------|---------------|
| N | 0.0000000000 | 0.0542320055  | 1.1716354899  |
| C | 0.0000000000 | -0.4086705496 | 2.2567032214  |
| O | 0.0000000000 | 0.7267430291  | 0.0112646075  |
| S | 0.0000000000 | -0.2333170857 | -1.3354563686 |

**TS1**

RCCSD(T)/AUG-CC-PV(T+D)Z ENERGY=-565.40752578

|   |               |               |               |
|---|---------------|---------------|---------------|
| S | 0.0093750633  | 0.0000025424  | -0.0342634146 |
| O | -0.0216006473 | -0.0000042404 | 1.7512225359  |
| C | 1.2945232270  | 0.0000016878  | 1.7264794381  |
| N | 2.0238893571  | 0.0000110103  | 0.7379024406  |

RCCSD(T)-F12/VTZ-F12 ENERGY=-565.48048286

|   |               |               |               |
|---|---------------|---------------|---------------|
| S | 0.0106564757  | 0.0000104011  | -0.0264748009 |
| O | -0.0185679670 | -0.0000167730 | 1.7442101171  |
| C | 1.2931879108  | 0.0000029425  | 1.7232664479  |
| N | 2.0209105805  | 0.0000144295  | 0.7403392359  |

**TS3**

RCCSD(T)/AUG-CC-PV(T+D)Z ENERGY=-565.45533146

|   |               |               |               |
|---|---------------|---------------|---------------|
| C | -0.6726345190 | 0.1353483061  | -1.2974544283 |
| N | 0.5134648599  | 0.2535452372  | -1.4759557714 |
| S | 0.0361755505  | -0.4795525194 | 0.4400672547  |
| O | -0.0170458389 | 0.6373647259  | 1.3843293284  |

RCCSD(T)-F12/VTZ-F12 ENERGY=-565.53070365

|   |               |               |               |
|---|---------------|---------------|---------------|
| C | -0.6709132822 | 0.1335311183  | -1.2748961251 |
| N | 0.5071094377  | 0.2538302324  | -1.4719833936 |
| S | 0.0374863695  | -0.4755676015 | 0.4336057054  |
| O | -0.0154007859 | 0.6304943389  | 1.3768646475  |

**TS4**

CCSD(T)/AUG-CC-PV(T+D)Z ENERGY=-565.32390277

|   |               |               |               |
|---|---------------|---------------|---------------|
| S | -0.0046317282 | -0.0008866704 | -0.0110217689 |
| O | -0.0116654601 | -0.0006930289 | 1.7471320756  |
| N | 1.3666037148  | 0.0033172271  | 1.1343006740  |
| C | 2.5493714735  | 0.0065334722  | 1.4577050193  |

CCSD(T)-F12/VTZ-F12 ENERGY=-565.39567581

|   |               |               |               |
|---|---------------|---------------|---------------|
| S | -0.0001146013 | -0.0008384504 | -0.0036990289 |
| O | -0.0033151277 | -0.0006431086 | 1.7411853328  |
| N | 1.3617496851  | 0.0031697732  | 1.1336017380  |
| C | 2.5413580439  | 0.0065827857  | 1.4570279581  |

**CN**

UCCSD(T)/AUG-CC-PV(T+D)Z ENERGY=-92.57279337

|   |              |              |              |
|---|--------------|--------------|--------------|
| C | 0.0721684324 | 0.0054673055 | 0.0000000000 |
| N | 1.2478315676 | 0.0945326945 | 0.0000000000 |

UCCSD(T)-F12/VTZ-F12 ENERGY=-92.60041792

|   |              |              |              |
|---|--------------|--------------|--------------|
| C | 0.0748596929 | 0.0056711889 | 0.0000000000 |
| N | 1.2451403071 | 0.0943288111 | 0.0000000000 |

### singlet SO

RCCSD(T)/AUG-CC-PV(T+D)Z ENERGY=-472.79013550

|   |               |               |              |
|---|---------------|---------------|--------------|
| S | -0.0901745700 | -0.0068314068 | 0.0000000000 |
| O | 1.4101745700  | 0.1068314068  | 0.0000000000 |

RCCSD(T)-F12/VTZ-F12 ENERGY=-472.83465433

|   |               |               |              |
|---|---------------|---------------|--------------|
| S | -0.0847484411 | -0.0064203364 | 0.0000000000 |
| O | 1.4047484411  | 0.1064203364  | 0.0000000000 |

### triplet SO

RCCSD(T)/AUG-CC-PV(T+D)Z ENERGY=-472.82625571

|   |               |               |              |
|---|---------------|---------------|--------------|
| S | -0.0841755346 | -0.0063769344 | 0.0000000000 |
| O | 1.4041755346  | 0.1063769344  | 0.0000000000 |

RCCSD(T)-F12/VTZ-F12 ENERGY=-472.87012350

|   |               |               |              |
|---|---------------|---------------|--------------|
| S | -0.0791709341 | -0.0059977980 | 0.0000000000 |
| O | 1.3991709341  | 0.1059977980  | 0.0000000000 |

### CO

RCCSD(T)/AUG-CC-PV(T+D)Z ENERGY=-113.16219363

|   |              |              |              |
|---|--------------|--------------|--------------|
| C | 0.0936102726 | 0.0070916873 | 0.0000000000 |
| O | 1.2263897274 | 0.0929083127 | 0.0000000000 |

RCCSD(T)-F12/VTZ-F12 ENERGY=-113.19975369

|   |              |              |              |
|---|--------------|--------------|--------------|
| C | 0.0962882363 | 0.0072945634 | 0.0000000000 |
| O | 1.2237117637 | 0.0927054366 | 0.0000000000 |

### SN

UCCSD(T)/AUG-CC-PV(T+D)Z ENERGY=-452.34279935

|   |               |               |              |
|---|---------------|---------------|--------------|
| S | -0.0904340993 | -0.0068510681 | 0.0000000000 |
| N | 1.4104340993  | 0.1068510681  | 0.0000000000 |

UCCSD(T)-F12/VTZ-F12 ENERGY=-452.37822468

|   |               |               |              |
|---|---------------|---------------|--------------|
| S | -0.0858582940 | -0.0065044162 | 0.0000000000 |
| N | 1.4058582940  | 0.1065044162  | 0.0000000000 |
